# Supplementary material for: Soil Fungal Community Composition and Diversity of Culturable Endophytic Fungi from Plant Roots in the Reclaimed Area of the Eastern Coast of China
Source: MDPI journal article supplement (doi:10.3390/jof8020124), 2022-01-27
Supplement: s1 [file s1]

Table S1. The fungal strains isolated from the plant roots in the investigated sites.

[illegible]
